# Supplementary material
Source: MDPI journal article supplement (https://www.mdpi.com/2073-4433/11/1/35)
Supplement: s1 [file s1]

# Supplementary Materials: Enhancing Potential of Trimethylamine Oxide on Atmospheric Particle Formation

Nanna Myllys <sup>1,\*</sup> , Tuomo Ponkkonen <sup>2</sup>, Sabrina Chee <sup>1</sup>, and James Smith <sup>1</sup> 

## 1. Enthalpies, Entropies and Gibbs Free Energies

Table S1 presents binding enthalpies  $\Delta H$ , entropies  $\Delta S$  and Gibbs free energies  $\Delta G$  of all sulfuric acid clusters with trimethylamine oxide (TMAO), dimethylamine (DMA) and guanidine (GUA). The corresponding TMAO-containing cluster structures in xyz format are found in the supplementary zip folder.

**Table S1.** Binding enthalpies ( $\Delta H$ , kcal/mol), entropies ( $\Delta S$ , kcal/(mol K)) and Gibbs free energies ( $\Delta G$ , kcal/mol, calculated at 298.15 K).

| Cluster  | $\Delta H$   | $\Delta S$ | $\Delta G$ |
|----------|--------------|------------|------------|
| 1sa1tmao | -32.18322673 | -34.920    | -21.77     |
| 1sa2tmao | -56.06440660 | -73.704    | -34.09     |
| 1sa3tmao | -73.37817629 | -109.196   | -40.82     |
| 1sa4tmao | -88.28659373 | -139.939   | -46.56     |
| 2sa1tmao | -60.03857843 | -76.472    | -37.24     |
| 2sa2tmao | -90.56865434 | -110.843   | -57.52     |
| 2sa3tmao | -119.4695584 | -157.075   | -72.64     |
| 2sa4tmao | -141.0910972 | -190.579   | -84.27     |
| 3sa1tmao | -85.45125574 | -123.634   | -48.59     |
| 3sa2tmao | -121.9005101 | -154.788   | -75.75     |
| 3sa3tmao | -155.9899463 | -197.338   | -97.15     |
| 3sa4tmao | -183.9793932 | -236.825   | -113.37    |
| 4sa1tmao | -106.3854315 | -164.245   | -57.42     |
| 4sa2tmao | -148.7282098 | -194.019   | -90.88     |
| 4sa3tmao | -190.1134950 | -242.604   | -117.78    |
| 4sa4tmao | -221.9682212 | -284.864   | -137.04    |
| 2tmao    | -13.81391411 | -34.505    | -3.53      |
| 3tmao    | -24.91821751 | -70.085    | -4.02      |
| 4tmao    | -37.93158466 | -106.902   | -6.06      |
| 1sa1dma  | -22.17176522 | -30.259    | -13.15     |
| 1sa2dma  | -36.53433065 | -66.044    | -16.84     |
| 1sa3dma  | -51.82356685 | -105.073   | -20.50     |
| 1sa4dma  | -64.44927049 | -145.991   | -20.92     |
| 2sa1dma  | -54.46582365 | -75.803    | -31.87     |
| 2sa2dma  | -82.46719797 | -116.287   | -47.80     |
| 2sa3dma  | -102.1051307 | -157.467   | -55.16     |
| 2sa4dma  | -116.5346491 | -191.740   | -59.37     |
| 3sa1dma  | -78.94652149 | -120.447   | -43.04     |
| 3sa2dma  | -110.9413881 | -159.104   | -63.51     |
| 3sa3dma  | -142.3888000 | -202.227   | -82.10     |
| 3sa4dma  | -163.9221030 | -241.571   | -91.90     |
| 4sa1dma  | -97.45230567 | -160.934   | -49.47     |
| 4sa2dma  | -135.1529839 | -206.896   | -73.47     |
| 4sa3dma  | -166.0450292 | -240.667   | -94.29     |
| 4sa4dma  | -196.1323563 | -275.835   | -113.89    |
| 2dma     | -3.654761626 | -26.762    | 4.32       |
| 3dma     | -11.51196982 | -60.408    | 6.50       |
| 4dma     | -19.50276342 | -84.997    | 5.84       |
| 1sa1gua  | -29.38971226 | -30.365    | -20.34     |
| 1sa2gua  | -49.50901342 | -70.716    | -28.43     |
| 1sa3gua  | -71.41231126 | -111.597   | -38.14     |
| 1sa4gua  | -90.94789974 | -152.269   | -45.55     |
| 2sa1gua  | -62.17903499 | -82.402    | -37.61     |
| 2sa2gua  | -100.8614343 | -111.970   | -67.48     |
| 2sa3gua  | -126.5774611 | -167.702   | -76.58     |
| 2sa4gua  | -151.0306295 | -207.854   | -89.06     |
| 3sa1gua  | -86.19536698 | -120.908   | -50.15     |
| 3sa2gua  | -131.4567435 | -166.061   | -81.95     |
| 3sa3gua  | -170.3301352 | -200.817   | -110.46    |
| 3sa4gua  | -203.9377305 | -240.451   | -132.25    |
| 4sa1gua  | -107.4876551 | -161.589   | -59.31     |
| 4sa2gua  | -156.9157684 | -209.605   | -94.42     |
| 4sa3gua  | -202.8881849 | -247.559   | -129.08    |
| 4sa4gua  | -255.8136593 | -293.435   | -168.33    |
| 2gua     | -12.42103630 | -34.152    | -2.24      |
| 3gua     | -24.88994819 | -73.183    | -3.07      |
| 4gua     | -44.92701155 | -115.500   | -10.49     |
| 2sa      | -17.76423906 | -36.844    | -6.78      |
| 3sa      | -36.70924364 | -80.667    | -12.66     |
| 4sa      | -52.62105419 | -107.963   | -20.43     |

## 2. Dimethylamine and Guanidine Containing Clusters

Figure S1 presents the main cluster growth pathways of SA–GUA and SA–DMA clusters at  $[\text{acid}] = [\text{base}] = 10^6$  and  $[\text{acid}] = [\text{base}] = 10^7 \text{ cm}^{-3}$ , at 298.15 K.

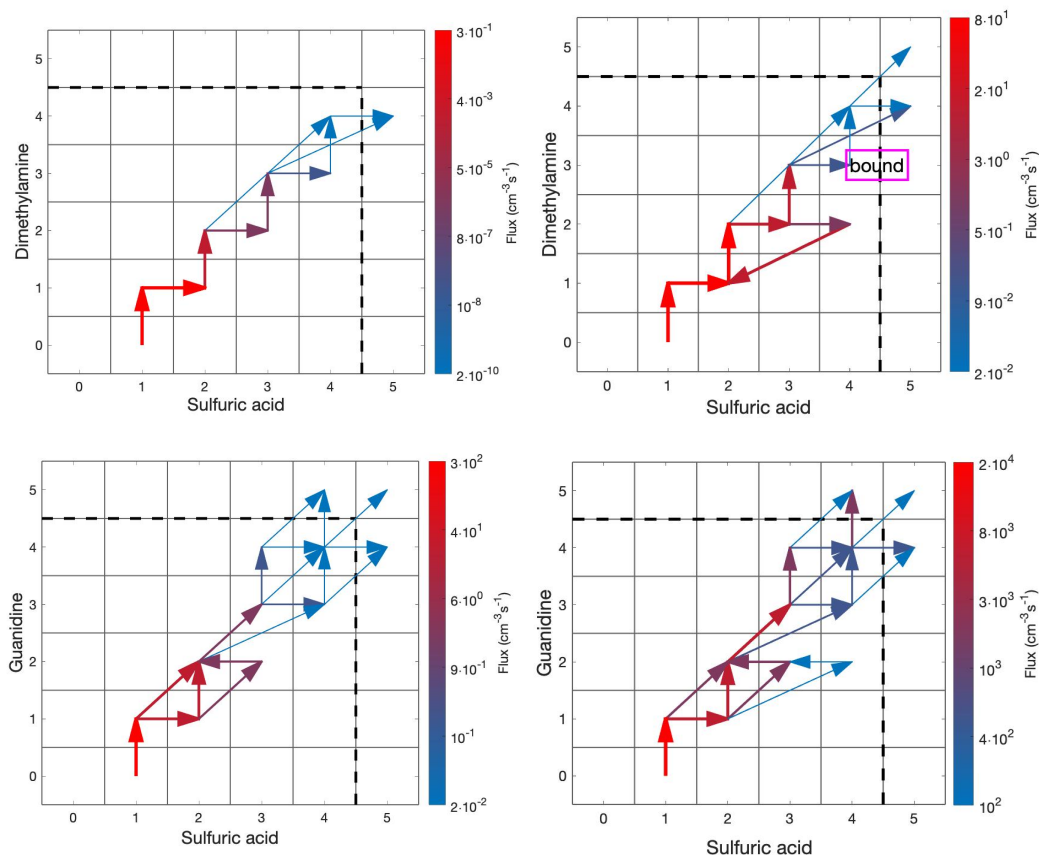

**Figure S1.** Main cluster growth pathways for SA–DMA (top) and SA–GUA clusters (bottom) at 298.15 K and vapor concentrations of  $[\text{acid}] = 10^6 \text{ cm}^{-3}$  and  $[\text{base}] = 10^6 \text{ cm}^{-3}$  (left) and  $[\text{acid}] = 10^7 \text{ cm}^{-3}$  and  $[\text{base}] = 10^7 \text{ cm}^{-3}$  (right). The  $x$ - and  $y$ -axes give the numbers of acid and base molecules in the cluster, respectively.

Figure S2 shows the actual vapor concentration-dependent Gibbs free energies of SA–GUA and SA–DMA clusters at  $[\text{acid}] = [\text{base}] = 10^6$  and  $[\text{acid}] = [\text{base}] = 10^7 \text{ cm}^{-3}$ , at 298.15 K.

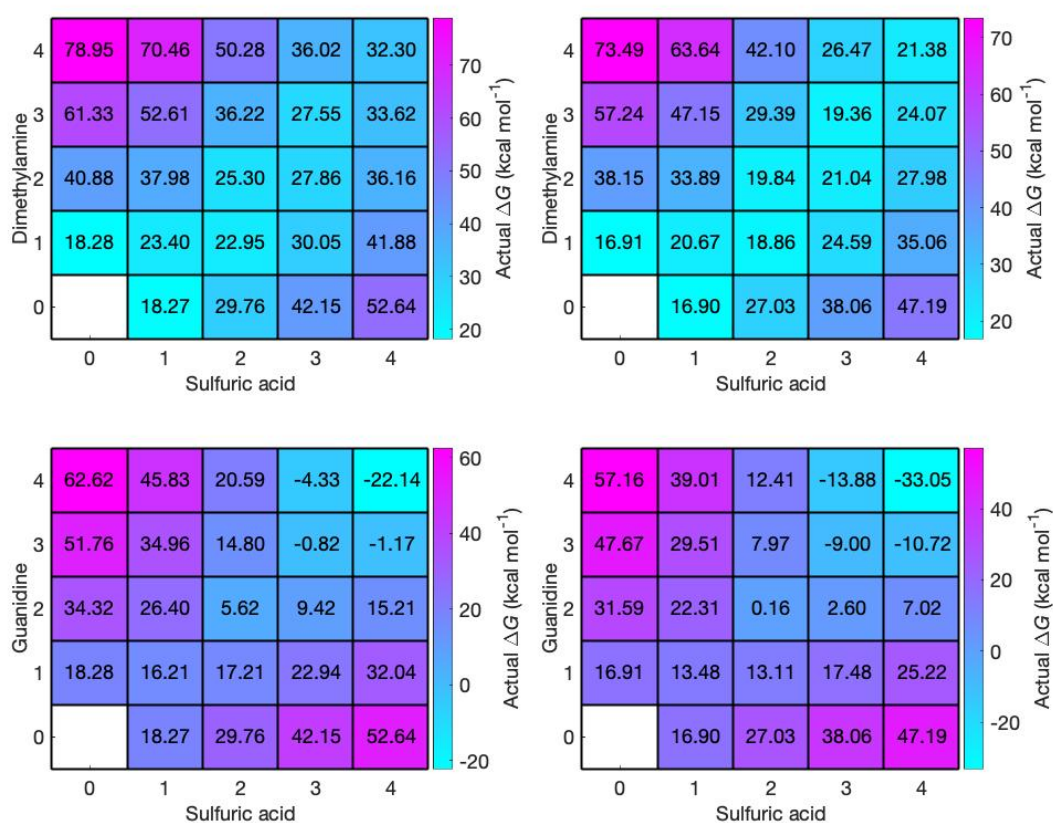

**Figure S2.** Vapor concentration-dependent Gibbs free energies for SA-DMA (top) and SA-GUA clusters (bottom) at 298.15 K and vapor concentrations of [acid]= $10^6 \text{ cm}^{-3}$  and [base]= $10^6 \text{ cm}^{-3}$  (left) and [acid]= $10^7 \text{ cm}^{-3}$  and [base]= $10^7 \text{ cm}^{-3}$  (right). The  $x$ - and  $y$ -axes give the numbers of acid and base molecules in the cluster, respectively.

Figure S3 shows the steady-state cluster distributions of SA-GUA and SA-DMA clusters at [acid]=[base]= $10^6$  and [acid]=[base]= $10^7 \text{ cm}^{-3}$ , at 298.15 K.

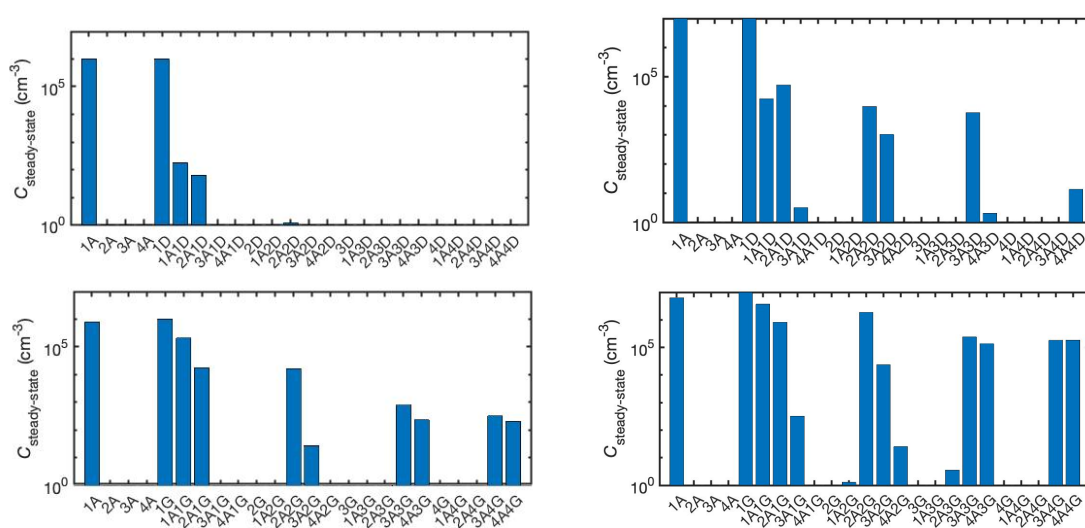

**Figure S3.** Steady-state cluster distributions for SA-DMA (top) and SA-GUA clusters (bottom) at 298.15 K and vapor concentrations of [acid]= $10^6 \text{ cm}^{-3}$  and [base]= $10^6 \text{ cm}^{-3}$  (left) and [acid]= $10^7 \text{ cm}^{-3}$  and [base]= $10^7 \text{ cm}^{-3}$  (right). Here A refers to sulfuric acid, D to dimethylamine and G to guanidine.
